# Supplementary material for: Challenging PD-L1 expressing cytotoxic T cells as a predictor for response to immunotherapy in melanoma
Source: PubMed Central journal article supplement (PMC6062523; doi:10.1038/s41467-018-05047-1), 2018-07-26
Supplement: 41467_2018_5047_MOESM1_ESM.pdf [file 41467_2018_5047_MOESM1_ESM.pdf]

**Supplementary Table 1: Patient characteristics**

|                                                       |                               |                     |
|-------------------------------------------------------|-------------------------------|---------------------|
| Number of patients, n                                 |                               | 55                  |
| Age at diagnosis, years (median - IQR)                |                               | 53 (36 - 65)        |
| Female/male ratio (%)                                 |                               | 51/49               |
| <b>Stage at diagnosis, %</b>                          |                               |                     |
| Stage I                                               | Stage IA                      | 10.9                |
|                                                       | Stage IB                      | 29.1                |
| Stage II                                              | Stage IIA                     | 16.4                |
|                                                       | Stage IIB                     | 10.9                |
|                                                       | Stage IIC                     | 5.5                 |
| Stage III                                             | Stage IIIA                    | 9.1                 |
|                                                       | Stage IIIB                    | 16.4                |
|                                                       | Stage IIIC                    | 1.8                 |
| Follow-up time since diagnosis, months (median - IQR) |                               | 61.0 (38.0 - 112.0) |
| <b>Evolution during follow-up</b>                     |                               |                     |
|                                                       | disease relapse, % (n)        | 27.3 (15/55)        |
|                                                       | melanoma related death, % (n) | 10.9 (6/55)         |
| <b>Stage at inclusion, %</b>                          |                               |                     |
| Stage I                                               | Stage IA                      | 7.3                 |
|                                                       | Stage IB                      | 27.3                |
| Stage II                                              | Stage IIA                     | 10.9                |
|                                                       | Stage IIB                     | 7.3                 |
|                                                       | Stage IIC                     | 5.5                 |
| Stage III                                             | Stage IIIA                    | 9.1                 |
|                                                       | Stage IIIB                    | 21.8                |
|                                                       | Stage IIIC                    | 10.9                |
| Time of inclusion, months (median - IQR)              |                               | 15.0 (4.0 - 60.0)   |
| Follow-up time since inclusion, months (median - IQR) |                               | 46.0 (22.0 - 55.0)  |
| <b>Evolution during follow-up after inclusion</b>     |                               |                     |
|                                                       | disease relapse, % (n)        | 10.9 (6/55)         |
|                                                       | melanoma related death, % (n) | 10.9 (6/55)         |
